# Mapping total microbial communities and waterborne pathogens in household drinking water in China by citizen science and metabarcoding

1  
2 **Xinyi Wen<sup>1,2,3</sup>, Chutong Fang<sup>1,4</sup>, Lihan Huang<sup>1,5</sup>, Jiazheng Miao<sup>1,6</sup>, Yajuan Lin<sup>1,7\*</sup>**

3  
4 <sup>1</sup>Division of Natural and Applied Science, Duke Kunshan University, Kunshan, Jiangsu, China

5 <sup>2</sup>Nicholas School of the Environment, Duke University, Durham, NC, United States

6 <sup>3</sup>Department of Civil and Environmental Engineering, Pratt School of Engineering, Duke University,  
7 Durham, NC, United States

8 <sup>4</sup>Blum Center for Developing Economies, University of California - Berkeley, Berkeley, CA, United  
9 States

10 <sup>5</sup>Department of Civil and Environmental Engineering, School of Engineering, Stanford University,  
11 Stanford, CA, United States

12 <sup>6</sup>Department of Biomedical Informatics, Harvard Medical School, Harvard University, Boston, MA,  
13 United States

14 <sup>7</sup>Department of Life Sciences, College of Science, Texas A&M University - Corpus Christi, Corpus  
15 Christi, TX, United States

16  
17 **\* Corresponding author**

18 E-mail: [yajuan.lin@tamucc.edu](mailto:yajuan.lin@tamucc.edu)

19  
20 **Keywords: Citizen Science, Tool kit, Household drinking water, Microbial communities,**  
21 **Waterborne pathogens, Metabarcoding.**

## 22 **Abstract**

23 Ensuring safe drinking water is one of the top priorities in public health as waterborne diseases  
24 remain a global challenge. In China, microbial contamination in drinking water is of particular  
25 concern and comprehensive survey/monitoring of the drinking water microbiome is necessary.  
26 However, traditional culture-based microbial monitoring methods have significant limitations, and  
27 nationwide tap water survey/monitoring in China would require significant resources. Here, a cost-  
28 effective and culture-independent citizen science approach was developed to sample the microbiome  
29 in household drinking water (n = 50) from 19 provinces in China from December 2020 to August  
30 2021, including a few opportunistic samples collected in situ right after extreme weather events such  
31 as the 2021 Henan Floods and Typhoon In-Fa Landfall. Using a protocol optimized for low-biomass  
32 samples, 22 out of 50 tap water samples were tested positive for microbial DNA. 16S rRNA gene  
33 metabarcoding were conducted on pooled samples, yielding 7,635 Amplicon Sequence Variants  
34 (ASVs), which revealed a diverse microbiome in household tap water. Alarming, pathogenic  
35 bacteria including *Mycobacterium* spp., *Acinetobacter* spp., and *Legionella* spp. were detected in all  
36 PCR positive samples. Despite the limited number of samples, a significant number of pathogenic  
37 species (e.g., *Salmonella enterica*) and/or toxin-producing cyanobacteria (e.g., *Microcystis* spp.) were  
38 detected in local tap water samples from Zhengzhou and Changzhou following the 2021 Henan  
39 Floods and Typhoon In-Fa Landfall, respectively. Overall, this study underscores the utility of citizen  
40 science in enhancing microbial monitoring and informs future public health strategies for water  
41 safety.

42

## 43 **1 Introduction**

44 With the growing demand for safe drinking water, microbial contamination in water resources  
45 and its related diseases is a focus of the world's water quality control today. Numerous studies show

46 that drinking water with microbial contamination can cause both acute and chronic damage to human  
47 health, with waterborne diseases posing a significant global health burden [1, 2]. There has been a  
48 rising incidence of waterborne human diseases such as gastrointestinal illness (e.g., diarrhea) and  
49 liver cancers which could be fatal [3-5]. The prevalence of human pathogens and toxin-producing  
50 bacteria in ambient and drinking water is a severe problem recognized globally [6]. Therefore, the  
51 scarcity of water resources that many countries including China have been facing is further  
52 exacerbated by water contamination [4, 5, 7].

53 A systematic review of China's drinking water sanitation from 2007 to 2018 shows that  
54 microbial contamination in drinking water is a particular concern in China [7]. To assess the potential  
55 health risks and obtain necessary data for microbiological water safety management in China, water  
56 monitoring, which supplies a comprehensive understanding of spatiotemporal patterns in drinking  
57 water microbiome, is urgently needed, especially at the point of use [8]. China CDC (Centers for  
58 Disease Control and Prevention) at all levels sample drinking water twice a year to obtain copious  
59 water quality data [7]. Due to the vastness of China, this nationwide water monitoring requires  
60 considerable investments of capital, time, personnel, and technology [7]. Fortunately, previous  
61 research has shown that citizen science can be an effective tool to increase spatial and temporal  
62 coverage of data [9]. In the context of China, citizen science could be a cost-effective approach to  
63 supplement China's national professional water monitoring systems [10, 11].

64 Citizen science can be broadly defined as a scientific approach in which the public (i.e.,  
65 people who have limited knowledge and skill in the targeted field) participate in the generation of  
66 scientific knowledge [11-14], commonly in data collection [11-14]. Citizen science has a history of  
67 several centuries in western societies, particularly in the environmental domain of which the breadth  
68 is immense [10-12]. Among citizen-based environmental monitoring programs, water resources  
69 monitoring is one of the major emerging fields [10]. It is especially active in Western countries [13,  
70 15-17] since the provision of safe drinking water is a defining aspect of a developed country [18].

71 The National Water Quality Monitoring Council (NWQMC) website, for example, has over 350  
72 volunteer monitoring groups registered across the U.S. in 2018 [15]. A more recent research pointed  
73 out that citizen science will play an increasing important role in promoting freshwater research,  
74 improving public understanding of the necessity to protect aquatic ecosystems, and engaging local  
75 communities and stakeholders in freshwater resource management [19].

76 However, several research gaps persist. First, compared with the long history and prosperity  
77 of citizen science development in Europe and the US, little research has been done in developing  
78 countries including China [15]. This can be attributed to multiple barriers, such as the late  
79 commencement of citizen science initiatives in China, low participation levels, and issues concerning  
80 data quality control, etc. Consequently, the cooperation between Chinese scientists and the public are  
81 limited to a few citizen-based environmental projects mainly focusing on birds and plants  
82 monitoring. However, with escalating concerns over environmental issue and the growing prevalence  
83 of big data and social media in China, a new era of citizen science in China is emerging [20]. For  
84 example, a recent study conducted by Wu et al. [21] revealed that most of the citizen science projects  
85 in China aiming to improving water quality are still ongoing, indicating great potential of the citizen  
86 science approach for water monitoring in the country.

87 Second, a global review of citizen science projects related to water quality measurement in  
88 the past 20 years [15] shows a significant focus on chemical-physical parameters such as nutrients,  
89 water transparency, and temperature, with very few addressing waterborne pathogens. Among these  
90 waterborne pathogen assessments, only *E. coli*, an indicator organism of microbial contamination  
91 risk in water used worldwide including China [6], was targeted. However, the efficacy of current  
92 indicator organisms in representing the potential presence of pathogens in water resources is still a  
93 subject of ongoing debate [2, 6]. Furthermore, a study suggests that China should incorporate  
94 additional microorganisms as alternative contamination indicators to improve its water quality

95 management [5]. Therefore, it is necessary to holistically assess microbial community compositions  
96 and pathogens in drinking water.

97 Third, traditional microbiological monitoring of drinking water generally relies on culture-  
98 based methods, such as the heterotrophic plate counts (HPC) of certain microbes [22, 23]. However,  
99 these methods can only account for a very small fraction (< 1%) of the drinking water microbiome  
100 [23-25]. To overcome this limitation, this study employed a culture-independent approach: microbial  
101 16S rRNA gene metabarcoding. This method enabled a holistic analysis of the microbial  
102 communities in the water samples [23, 26, 27].

103 To the best of our knowledge, this study is one of the first to utilize a citizen science approach  
104 to sample microbiome samples from household drinking water (i.e., tap water) across different  
105 regions in China, through a simple yet standardized methodology. Following the protocol developed  
106 by this study, citizen scientists (college student volunteers) collected 50 tap water samples from  
107 households across 32 administrative regions within 18 provinces/regions of China from December  
108 2020 to August 2021. This included several opportunistic samples collected after extreme  
109 precipitation events such as 2021 Henan Floods and Typhoon In-Fa Landfall. We successfully  
110 extracted microbial DNA from these low-biomass tap water samples, pooled all samples with  
111 positive 16S rRNA genes PCR amplification signals, and conducted high-throughput sequencing of  
112 the purified amplicons. This allowed us to characterize the total drinking water microbiome and  
113 identify potential waterborne pathogens.

114

## 115 **2 Materials and Methods**

### 116 **2.1 Sample Collection**

## 117 **2.1.1 Sites and Participants**

118           The sampling sites (Fig 1) were determined based on the coverage area (i.e., to cover as large  
119 an area as possible) and the possibility to recruit undergraduate student volunteers from the Duke  
120 Kunshan University (DKU) community. Due to the distribution of volunteers, samples mostly came  
121 from central and eastern China (latitude: ~22°N - 40°N; longitude: ~100°E - 122°E), including  
122 Beijing, Shandong Province, Jiangsu Province, Guangdong Province, etc.

123

### 124 **Fig 1. Geographical locations of sampling sites.**

125 Map showing the geographic locations of the citizen science samples and the PCR amplification  
126 results (Software: Datawrapper). Red dots denote tap water samples showing positive PCR signals,  
127 blue dots indicate negative PCR signals, and yellow diamonds represent samples that were collected  
128 but did not pass quality control. Some locations were sampled multiples times at different time  
129 points.

130

131           All student volunteers were recruited after a simple screening process. First, their relevant  
132 experiences (e.g., majors) were considered and those with natural science majors and lab experience  
133 were preferred. Besides, ideal volunteers would go home or go on a trip to any place(s) in China  
134 during the sampling period. Volunteers who met those two criteria or at least one of them were  
135 recruited through one-to-one conversation on WeChat (a popular Chinese communication app similar  
136 to WhatsApp). Communication between volunteers and investigators is a key component of this  
137 study to ensure the quality of the samples as much as possible. This is the main reason why  
138 volunteers were recruited from the DKU community – they can easily reach out to us either in person  
139 or via WeChat once any problem emerges.

140

## 141 **2.1.2 Preparation and Tool Kit**

142           A sampling protocol was developed based on Buxton et al.'s [16] research on citizen science

143 methods because volunteers in this study performed highly similar tasks (i.e., water sample collection  
144 and filtration) as their research. A detailed version of the protocol is provided in the “Citizen science  
145 sampling protocol and materials” (CS 1). Two innovative aspects of this protocol are (1) the easy-to-  
146 use and low-cost Corning syringe filters (instead of pumps and Sterivex filter cartridge) were adopted  
147 for water sampling, and (2) the disinfection procedure was emphasized by listing all the possible  
148 exposed objects and surface during the entire sampling process. Briefly, it is recommended to  
149 conduct the experiment on the day or at most one day before shipping the sample. Volunteers first  
150 put on the gloves and disinfect their hands as well as everything that they may touch during the  
151 operation using the disinfectant wipes (Brand: Mian Zhi Run, 75% Ethanol and RO purified water).  
152 Then, a sterilized 1 L stand-up bag with sodium thiosulfate to remove residual chlorine was unsealed  
153 and filled with 1 L tap water. A disposable sterile 50 mL syringe was used to pass the sample water  
154 across a sterile Corning syringe filter unit (CLS431229, 0.20  $\mu\text{m}$  pore size, 28 mm diameter) and  
155 refilled until 1 L of water has been filtered or the filter unit has become blocked. Afterwards, a  
156 syringe of air was pushed through the filter unit to reduce the amount of residual water in the sealed  
157 unit. The filter unit was then sealed in a Ziplock bag and kept frozen in a household freezer prior to  
158 transportation to the laboratory (DKU Environmental Research Lab in Kunshan). For transportation,  
159 the protocol requires burying the filter unit sample among four to five ice packs in a Styrofoam box.  
160 Depending on the distance between the sampling site and Kunshan, along with the student’s mode of  
161 travel (i.e., same-day flights or high-speed train), samples were either delivered via express delivery  
162 service or personally carried to the laboratory by volunteers.

163 To further clarify the procedures and reduce variability in sample collection, an 11-minute  
164 video tutorial (720p resolution) was created, providing volunteers with a visual guide on the tools and  
165 procedures for sample collection, filtration, storage, and shipping (Fig 2 & 3 and CS 3). Furthermore,  
166 in-person demonstrations were provided at DKU Environmental Research Lab for available  
167 volunteers following the demonstration model of Willis et al. [28]. A compact sampling kit was

168 distributed to each volunteer before their trip (Fig 2). Each kit (in a 78.7×51.2×49.2 inch Styrofoam  
169 box) contained one set of all tools mentioned in the protocol and a sampling information form (CS 1  
170 & 2) adapted from Buxton et al.'s [16]. This form collected information such as volunteer names,  
171 sampling time, geographic coordinate of the sampling site obtained from cell phone, etc. Alongside  
172 the form, volunteers were requested to label the Ziploc bag containing the sample with their names  
173 for convenient sample tracking in the stage of data collection. Upon recipient in lab, each sample was  
174 associated with an anonymous ID number and any data with identifiers was securely eliminated,  
175 ensuring no specific identity-related information was present during data processing. The ID number  
176 of each sample consists of two parts separated by an underscore – a two-letter abbreviation of the  
177 sampling site (city) followed by a four-digit sampling date (S1 Table). For example, the sample  
178 collected in Beijing on June 20 was named as “BJ\_0620” and the full names of other mentioned  
179 samples are provided in the “Non-standard abbreviations” section.

180

181 **Fig 2. The sampling tool kit.**

182

183 **Fig 3. Screenshots from the demonstration video showing the sampling process and the syringe**  
184 **filter.**

185

186 An online sharing document (Tencent Sharing Document, with English translation provided  
187 in CS 3) was sent to each volunteer via WeChat, including the brief introduction to the research  
188 project, sampling kit, and sampling protocol as well as the links to the video tutorial and the  
189 electronic sampling information form (a Qualtrics survey was created to supplement the printed  
190 form). Notably, key elements in the document were highlighted in red and a larger font size for  
191 clarity. All the materials were provided in Chinese to facilitate understanding among the recruited  
192 student volunteers who were all Chinese. The online sharing document enabled them to easily see



193 any modifications that were made later.

194 Before the recruitment of volunteers, several trial runs of sampling were conducted by the  
195 authors, including sampling sites in Kunshan, Hangzhou, Changzhou, and Beijing. Along with the  
196 sampling protocol and kit, methods and conditions for sample shipping (i.e., express delivery vs.  
197 same-day bullet trains or planes) were tested and compared to identify the most effective procedures  
198 for DNA preservation.

199

### 200 **2.1.3 Sample Collection and Filtration**

201 The formal sample collection by student volunteers was conducted from December 2020 to  
202 August 2021. At each sampling site, one to four samples were collected. For sites with more than one  
203 sample, all valid samples were included to represent the site's microbiome. With the help of 25  
204 volunteers, 50 household drinking water samples were collected from 32 administrative regions  
205 spanning 19 provinces/regions in China.

206 During this study, two extreme weather events were captured by opportunistic sampling. Tap  
207 water samples were collected by volunteers from Changzhou, Jiangsu Province and Hangzhou,  
208 Zhejiang Province before and after the landfall of Typhoon In-Fa (July 22 – 31, 2021 in China), and  
209 from Zhengzhou, Henan Province following an extremely destructive flood event (2021 Henan  
210 Floods).

211 Typhoon In-Fa (number 2106) was a Category 2 typhoon (SSHWS) which has been the second-  
212 wettest tropical cyclone ever recorded in China. As a tropical storm, it consecutively hit Putuo  
213 District of Zhoushan and Pinghu in Zhejiang Province on July 25 and 26 respectively. Typhoon In-Fa  
214 passed nearby Hangzhou from July 25 to 26 as a typhoon and Changzhou from July 26 to 27 as a  
215 tropical storm [29]. On the other hand, 2021 Henan Floods in Zhengzhou (July 17 – 23, 2021) was  
216 indirectly influenced by Typhoon In-Fa. From July 19 to 21, Zhengzhou suddenly encountered the

217 most severe rainstorm of the last 50 years which has led to extremely severe urban inland inundation,  
218 floods, and landslide. In particular, the 24-hour precipitation in Zhengzhou from 8:00 on July 20 to  
219 8:00 on July 21 was 624.1 millimeters (2.05 ft), which is only about 14.4 mm (0.57 in) lower than the  
220 average annual precipitation in Zhengzhou in the past 22 years (638.5 mm) [30]. According to the  
221 Investigation Report on 2021 Henan Floods issued by Ministry of Emergency Management of the  
222 People's Republic of China [31], the flood impacted over 14 million individuals and killed 398  
223 people in Henan, with the number of deaths in Zhengzhou accounting for 95.5% of the total death.  
224 Moreover, it resulted in 16 million hectares of submerged agricultural land and direct economic  
225 damages amounting to \$20.69 billion, accompanied by significantly higher indirect expenses.

226 For the areas affected by the typhoon landfall, student volunteers were instructed to sample  
227 tap water once pre- and post-typhoon respectively within a week. As for Zhengzhou, since the sudden  
228 occurrence of the extreme rainfalls and flooding was not anticipated and predicted by the China  
229 Meteorological Administration [32], pre-flooding sampling was not arranged. However, we  
230 successfully coordinated with and supplied the sampling kits to two volunteers residing in  
231 Zhengzhou – one living in a seriously affected region and the other in a moderately affected region –  
232 during the flood. They were instructed to collect three to four tap water samples on different days  
233 throughout the week following the flood.

234

## 235 **2.2 DNA Extraction, PCR Amplification, and Bacterial 16S**

### 236 **Metabarcoding**

237 At the DKU Environmental Research Lab, all samples were stored in a -80°C freezer prior to  
238 processing. For each sample, the filter membrane was removed from the sealed syringe filter unit and  
239 cut into eight strips using a sterile razor blade on a disposable petri dish. DNA extraction was then  
240 conducted using the Qiagen DNeasy Plant Mini Kit following the manufacturer's instructions, with

241 the exception of an additional bead-beating step implemented to enhance extraction efficiency. In  
242 brief, the filter strips were placed into a 2 mL microcentrifuge tube where 0.2 g of 0.1 mm Zr bead  
243 and 400 microliters of lysis buffer AP-1 were added for beat beating at 2000 rpm for 5 minutes. The  
244 final extracted DNA of each sample from the kit was dissolved in 40  $\mu$ L Qiagen elution buffer and  
245 stored in a -80°C freezer.

246 For PCR amplification, the V4 region of 16S rRNA gene was amplified by the universal  
247 primer pairs 515F (5'-GTGCCAGCMGCCGCGGTAA-3') and 805R (5'-  
248 GACTACNVGGGTATCTAAT-3') with dual barcode index and heterogenous spacers [33, 34].  
249 KAPA HiFi PCR Kit and the manufacturer's protocol was adopted. All PCR reactions were  
250 performed in triplicates with 25  $\mu$ L of each reaction mixture. Agarose gel electrophoresis was then  
251 performed to visualize amplicon fragments and PCR products were purified using QIAquick PCR  
252 Purification Kit (Qiagen) following the manufacturer's instructions. The purified PCR amplicons of  
253 each sample was dissolved in 30  $\mu$ L elution buffer and stored in a -80°C freezer.

254 Finally, the concentration of the purified PCR amplicons was measured by Qubit™ 4  
255 Fluorometer. Equimolar amounts of purified amplicons were pooled together and sent to *Genewiz* in  
256 Suzhou for an Illumina Miseq (250 PE) sequencing run.

257

## 258 **2.3 Auxiliary Data**

259 Previous studies found that drinking water microbiome exhibited seasonality which was  
260 correlated with temperature [35, 36]. Given the difficulties in measuring water and indoor  
261 temperature with the citizen science approach, outdoor temperature was collected as the indicator of  
262 seasonal environmental temperature change. The outdoor temperatures when collecting valid samples  
263 (n = 40) were retrieved from Weather Underground [37], an online portal that provides local weather  
264 data on an hourly basis.

265 In addition, to assess the potential risks of harmful bacteria detected in sampled tap water,  
266 information such as drinking water standards and microbial fact sheets was retrieved from  
267 environmental and health authorities including The United States Environmental Protection Agency  
268 (EPA) [38, 39], and World Health Organization (WHO) [40].

269

## 270 **2.4 Data Analysis**

### 271 **2.4.1 Sequence Processing**

272 To profile the microbiome in sampled tap water, 16S rRNA gene sequences were processed  
273 by a series of bioinformatics tools. First, paired-end sequencing reads with dual indices were  
274 demultiplexed and then trimmed to remove barcodes and primers using *Cutadapt* [41]. The resulting  
275 reads were then further processed following the *DADA2(v1.16)* pipeline [42]. Specifically, using the  
276 embedded functions in *DADA2*, quality filtering was performed before merging paired-end  
277 sequencing reads. After chimera checking, Amplicon Sequence Variant (ASV) was identified, and  
278 the abundance table for each sample was constructed. Finally, the “assignTaxonomy” function in  
279 *DADA2* was used to assign taxonomy to each ASV based on Silva r138 reference database (DOI  
280 10.5281/zenodo.4587955).

281

### 282 **2.4.2 Microbial Community Structure**

283 The relative abundance (RA) of all ASV in each sample was calculated and the following  
284 analyses of microbial compositions were based on RA.

285 Apart for the samples collected after Typhoon In-Fa and 2021 Henan Floods (“post-weather  
286 samples”), the remaining samples (“normal samples”) were divided into three nearly equal groups  
287 based on the outdoor temperatures to account for potential impacts of climate and seasonality: (a)  
288 High (H):  $T > 25\text{ }^{\circ}\text{C}$ ; (b) Medium (M):  $15\text{ }^{\circ}\text{C} < T \leq 25\text{ }^{\circ}\text{C}$ ; (c) Low (L):  $T \leq 15\text{ }^{\circ}\text{C}$  (Table 1). The

289 mean RA of each ASV in the three temperature categories was calculated for the ASV-level analyses.  
290 The most abundant ASVs in each category are presented in the supporting material S1 Text and S1  
291 Fig.

292

293 **Table 1 Sampling seasons: outdoor temperature categories.**

| Category | Range (°C)       | Number of samples |
|----------|------------------|-------------------|
| High     | $T > 25$         | 7                 |
| Median   | $15 < T \leq 25$ | 7                 |
| Low      | $T \leq 15$      | 6                 |

294

### 295 **2.4.3 Assessment of Potential Waterborne Bacterial Pathogens**

296 The bacteria genera in the dataset containing pathogenic species were selected based on  
297 *Aquatic Pollution: An Introductory Text* [43] and “Guidelines for Drinking-water Quality (4<sup>th</sup>  
298 Edition)” by WHO [40]. Subsequently, the taxonomy of the resulting ASVs was further validated  
299 using the BLAST+ tool [44] against the NCBI database during February 2022. Based on our criteria,  
300 only BLAST results with percent identity (p-ident) > 97% [45], expect value (E-value) < 10e-100  
301 [46], and query cover equals 100% were considered reliable results.

302 Subsequently, all potential pathogenic genera/species were grouped into two categories based  
303 on their occurrence in the drinking water samples. Those detected in more than 30% of all samples  
304 (i.e., 7 samples) were categorized as “common pathogens” while the rest were referred to as “rare  
305 pathogens.”

306

### 307 **2.4.4 Statistical Analyses**

308 All statistical analyses were performed in R (4.1.2 and 4.2.3) and a p-value threshold of 0.05  
309 was considered significant.

310 Fisher's exact test [47] was conducted to determine whether there is a significant relationship  
311 between PCR signals (i.e., positive or negative) and average annual rainfall (AAR) (humid regions: >  
312 800 mm, non-humid regions: < 800 mm).

313 Alpha-and beta-diversities were calculated at the ASV level to further describe the microbial  
314 communities in the samples. Alpha diversity refers to diversity (richness or evenness) within an  
315 ecosystem at the local small scale, while beta diversity measures the amount of differentiation  
316 between different ecosystems or local species communities [48]. For alpha-diversity of tap water  
317 microbial communities, each library was resampled in equal depth, and Chao1, Fisher, Shannon, and  
318 Simpson diversity indices were then calculated from observed read counts of ASVs using the  
319 "Phyloseq" package (version 1.38.0) in R [49]. The Shannon and Simpson indices including both  
320 ASV richness and evenness were computed because of their reduced sensitivity to differences in  
321 sample depth [50, 51]. To calculate beta-diversity, a principal coordinates analysis (PCoA) was  
322 performed based on the distance matrix of Bray-Curtis dissimilarity to visualize the ordination  
323 among the samples by *plot\_ordination()*. To test the significant differences among groups of tap  
324 water samples, permutational multivariate analysis of variance (PERMANOVA) and a post-hoc  
325 pairwise Adonis test were performed with *adonis2* function [52] and *pairwise.adonis()* function [53]  
326 respectively. To check if within-group variation is confused with among-group variation [54], a  
327 permutation test for homogeneity of multivariate dispersions (PERMDISP) [55] was performed with  
328 the *betadisper* function. In PERMANOVA and PERMDISP, the number of permutations was set to  
329 999.

330 To analyze the compositions and influencing factors of waterborne pathogens in the tap  
331 water, several correlation tests based on Spearman's rank correlation coefficients were conducted.  
332 First, Mantel test [56] was conducted to examine correlations between total microbial communities  
333 (top 100 ASVs), potential pathogens, and outdoor temperatures based on Bray-Curtis dissimilarity,  
334 Euclidean Distance, and Haversine Distance matrices (permutations = 9999). Second, linear

335 regression fits between outdoor temperatures and RAs of total potential pathogens were examined  
336 and visualized with *ggscatter()* in the “ggpubr” package. Third, linear correlations between RAs of  
337 potential pathogens, RAs of total microbial communities (Top10 ASVs), and alpha diversity of total  
338 microbial communities were assessed with *cor()*. The corresponding p values and confidence  
339 intervals were computed with *cor.mtest()*. The matrix with significance level codes was visualized  
340 with *corrplot.mixed()*.

341

## 342 **3 Results and Discussion**

### 343 **3.1 Sample Validity and PCR Signals**

344 Out of the 50 drinking water samples, 40 passed our quality control and they were collected  
345 from 28 administrative regions across China (Table S1). 10 samples were excluded from the study  
346 because of either (1) lab processing errors, or (2) improper handling during shipping and/or storage,  
347 which may have compromised DNA quality. Among the 40 valid samples, 29 samples showed  
348 positive PCR signals which were collected from 16 cities in 10 provinces, 4 municipalities, and  
349 Macau (Fig 1). Fisher’s exact test (S2 Table) reveals that no significant difference in PCR signals  
350 existed between the two rainfall groups ( $P = 0.69$ ). Interestingly, all the three tap water samples  
351 collected in Zhejiang Province, including the post-typhoon Hangzhou sample showed no PCR signal.  
352 This might be due to the high quality of source water in Zhejiang Province [57] and effective  
353 drinking water treatment in those two developed cities (Hangzhou and Ningbo). Alternatively, factors  
354 such as new/clean plumbing systems, suitable plumbing materials that do not support the growth of  
355 microorganisms, and shorter water stagnation time in the plumbing could also account for the  
356 negative PCR results [35, 58, 59].

357

### 358 **3.2 Citizen Science Sampling Approach**

359           This study is among the few studies on tap water microbiome via citizen science which can  
360 serve as a proof of concept for national-scale microbiological monitoring of tap water using citizen  
361 science and demonstrate its competitive advantages compared to non-citizen science sampling  
362 method.

363           Firstly, the study illustrates the cost-effectiveness and extensive coverage across China of the  
364 approach. With decentralized volunteer participation and affordable sampling kits, the sampling sites  
365 spanned 32 regions and various seasons, ensuring spatial and temporal diversity. It is worth  
366 mentioning that due to the adoption of Corning® syringe filter (~\$2.5–4/unit) [60], the cost per  
367 sampling kit was under \$7, which was around 1 – 1.5 times cheaper than using the traditional  
368 MilliporeSigma® Sterivex filter (~\$8–13/unit) for aquatic microbiome sampling [61]. Our DNA  
369 extraction protocol was optimized for this low-cost filter. In addition, this citizen science sampling  
370 approach significantly reduces travel and personnel expenses. Although the volunteers' sample  
371 collection lacked strict oversight, the high validity of 40 out of 50 drinking water samples passing  
372 quality control and the above consistency in results supports the method's applicability and reliability.

373           Furthermore, due to the flexibility of this sampling approach, we conducted timely  
374 opportunistic sampling of extreme weather events – specifically, Typhoon In-Fa and 2021 Henan  
375 Floods – by leveraging local volunteers in Hangzhou, Changzhou, and Zhengzhou. This citizen  
376 science approach proved to be particularly fast responding and effective given the limited funding  
377 and the urgent nature of these events. Additionally, the sample storage tests (S3 Text) confirmed that  
378 maintaining samples for 7 days at -18°C did not generate false positives in the absence of bacteria  
379 during collection, ensuring accurate pathogen identification and reliability of using household freezer  
380 for storage, thereby enhancing the flexibility and feasibility of the citizen science sampling approach.

381           Moreover, the citizen science approach aimed to bridge the gap between the scientific  
382 community and the public, raising awareness of pathogen pollution in drinking water and educating  
383 the public on health protection measures.



384

### 385 **3.3 Sequence Reads, ASVs, and Taxonomy Classification**

386 The DNA of microorganisms in 29 household drinking water samples were successfully  
387 extracted, PCR amplified with 16S primers and submitted for Illumina sequencing. However,  
388 following the demultiplexing process, five samples did not yield significant reads (all < 50 per  
389 library) and were excluded from the dataset, leading to a loss of two sampling sites (Shenzhen and  
390 Xiamen). In addition, two samples collected after the 2021 Henan Floods were excluded after the  
391 quality filtering and chimera checking because of relatively low reads (<3000 per library) compared  
392 to others. As a result, the 16S rRNA gene amplicon dataset in this study contained 22 samples after  
393 the preliminary processing (S1 Table).

394 In DADA2 quality filtering, proportions of output and input reads of 13 (59.1%) samples  
395 were lower than 50%, indicating low quality of raw DNA reads. This may be due to 1) potential  
396 degradation of DNA samples during sampling, shipping, or DNA processing; 2) residual DNA from  
397 dead bacteria cells, which are harmless to humans. After quality filtering and chimera removing,  
398 sequencing reads per sample ranged from 9,794 to 150,656, averaging at 60,884.

399 From the resulted dataset, 7635 ASVs were identified. According to the DADA2 taxonomy  
400 classification based on Silva r138 reference database, 100%, 99.5%, 96.8%, 92.3%, 81.8%, and  
401 59.4% of the sequencing reads could be assigned to kingdom, phylum, class, order, family, and genus  
402 level respectively. At the kingdom level, 99.9% of the reads were assigned to domains of bacteria  
403 (1,294,678 reads) and archaea (43,816 reads), while the other 0.1% of the sequences belonged to  
404 eukaryotes (739 reads).

405

### 406 **3.4 Microbial Community Structure**

### 407 **3.4.1 Compositions of Total Microbial Communities**

408 52 microbial phyla including 46 bacterial phyla and 6 archaeal phyla were detected in the  
409 household drinking water samples (n = 22). In all samples, 9 bacterial phyla and 1 archaeal phylum  
410 accounted for over 90.7% of total taxonomically assigned reads at phylum level (Table 2). All the ten  
411 phyla are both abundant and prevalent (i.e., occur in 91-100% of all samples), indicating a relatively  
412 even microbial distribution pattern in the samples at the Phylum level. The five most dominant  
413 bacterial phyla were *Proteobacteria* (mean percentage  $\pm$  SD: 55.0%  $\pm$  19.8%), *Planctomycetota*  
414 (10.5%  $\pm$  7.9%), *Acidobacteriota* (7.0%  $\pm$  6.0%), *Actinobacteria* (5.9%  $\pm$  6.6%), and *Cyanobacteria*  
415 (4.7%  $\pm$  3.5%) , comparable to a previous study in China [57]. Three of them were reported tolerant  
416 to drinking water treatment and distribution processes except for *Planctomycetota* and  
417 *Acidobacteriota* [57]. Interestingly, this bacterial composition differs from the primary bacterial  
418 assemblages revealed by several highly-cited studies conducted in other countries including the U.S.  
419 and Portugal, which predominantly feature *Proteobacteria*, *Actinobacteria*, and *Bacteroidetes* [62-  
420 64]. This implies a unique microbiome intrinsic to China's drinking water systems.

421 **Table 2 Number of sequences, ASVs, and genera for the top 10 phyla in the water samples.**

| Phylum                   | Sequence <sup>a</sup> | ASV  | Genus |
|--------------------------|-----------------------|------|-------|
| <i>Proteobacteria</i>    | 697642 (52.3%)        | 2693 | 281   |
| <i>Planctomycetota</i>   | 164487 (12.3%)        | 998  | 23    |
| <i>Actinobacteriota</i>  | 82262 (6.2%)          | 279  | 56    |
| <i>Acidobacteriota</i>   | 77415 (5.8%)          | 296  | 17    |
| <i>Cyanobacteria</i>     | 72219 (5.4%)          | 402  | 25    |
| <i>Crenarchaeota</i>     | 43624 (3.3%)          | 31   | 5     |
| <i>Bacteroidota</i>      | 38869 (2.9%)          | 603  | 61    |
| <i>Verrucomicrobiota</i> | 33769 (2.5%)          | 411  | 27    |
| <i>Bdellovibrionota</i>  | 31056 (2.3%)          | 400  | 8     |
| <i>Desulfobacterota</i>  | 21608 (1.6%)          | 59   | 11    |
| Others                   | 70371 (5.3%)          | 1209 | 93    |
| N.A.                     | 6133 (0.5%)           | 254  | /     |

422 Those three represent the coverage, diversity, and the genus spectrum of microbial community in the  
423 water samples respectively. <sup>a</sup> The percentage of sequences was the phylum sequences in the total of  
424 assigned sequences at the phylum level which was 1,333,322.

425 The phylum-level taxonomic composition for each sample is detailed in Fig 4 and S3 Table.  
426 In this study, *Proteobacteria* (class  $\alpha$ - and  $\gamma$ -*Proteobacteria*) was the most predominant phylum in 20  
427 samples and the second most in others. It accounts for 29.9 – 99.0% of the reads in each sample, with  
428 the highest relative abundance detected in Huizhou (HZ\_0219). Among all the samples,  
429 *Sphingomonas* was the most abundant genus of *Proteobacteria*. This result was consistent with the  
430 previous study [57] that found *Proteobacteria* to be dominant in tap water collected mostly from  
431 central and eastern China, and the genus *Sphingomonas* grew during chlorination [65] or  
432 monochloramine treatment [66].

433 **Fig 4. Taxonomic composition and relative abundance of microbiota in the sampled household**  
434 **drinking water in China at the phylum level.**

435 “\*” denotes the samples collected after extreme rainfall events. Normal samples are grouped based  
436 on the outdoor temperature. Only the top 10 phyla (1-10: bottom to top in the legend) and not  
437 assigned (NA) ones are shown.

438  
439 However, two samples CZ\_0220 (Changzhou, Feb. 20) and NC\_0210 (Nanchang, Feb.10)  
440 were dominated by *Crenarchaeota*, a common archaeal phylum. Specifically, *Crenarchaeota*  
441 accounted for 33.3% and 35.0% with the genus *Candidatus Nitrosotenuis* (32.0%) and *Candidatus*  
442 *Nitrosotalea* (34.9%) being most abundant in samples CZ\_0220 and NC\_0210 respectively. This  
443 showed that in addition to a variety of bacteria, archaea can also grow in tap water, which could be  
444 supported by the studies which detected the archaeal phylum *Crenarchaeota* in drinking water  
445 distribution systems or drinking water-related environments [24, 67-70]. In particular, Inkinen et al.  
446 [67] found a high abundance of archaeal reads from the genus *Candidatus Nitrosotenuis* and  
447 *Candidatus Nitrosotalea* in drinking water distribution systems supplying non-disinfected waters.

448 This suggests that the disinfection processes of samples CZ\_0220 and NC\_0210 may be less  
449 effective compared to others.

450 Interestingly, compared to the winter Changzhou sample CZ\_0220, the pre-typhoon CZ\_0712  
451 and post-typhoon samples CZ\_0728 collected from the same city household in July were much more  
452 similar in overall composition at the phylum level, indicating a seasonal effect. However, the post-  
453 typhoon sample CZ\_0728 exhibited higher *Actinobacteria* (increased from 2.2% to 7.1%) and  
454 *Cyanobacteria* (increased from 5.2% to 14.9%), which are the phyla containing potential waterborne  
455 pathogens and the species that produce cyanotoxins, respectively. Elevated levels of the pathogen  
456 *Mycobacterium* spp. (more details in Section 3.5) as well as toxin-producing *Cyanobacteria* spp.  
457 were observed in post-typhoon sample CZ\_0728. Specifically for cyanobacteria, *Microcystis* spp.  
458 were higher in RA while *Cylindrospermopsis* sp. and *Dolichospermum* sp. appeared after the  
459 typhoon event. Other toxic species of *Cyanobacteria*, including *Aphanizomenon* sp. and *Anabaena*  
460 sp., were detected in normal samples collected from Shanghai, Lanzhou, Xi'an, etc. Many  
461 *Cyanobacteria* spp. from those genera can produce a variety of cyanotoxins such as Microcystins and  
462 Cylindrospermopsin, which can cause liver and kidney damage and have potential carcinogenicity  
463 [39]. Similarly, a substantial rise in the RA of *Cyanobacteria* was reported in treated water samples  
464 collected from a drinking water treatment plant in Jiangsu Province after Typhoon Lekima in August  
465 2019 ( $P < 0.05$ ) [71]. In this study, although remained detectable, the RA of *Cyanobacteria* in post-  
466 typhoon sample CZ\_0728 decreased to the pre-typhoon level by the third day after the typhoon event.

467

### 468 **3.4.2 Beta-Diversities**

469 The beta diversity of the total microbial communities in sampled tap water is shown in Fig 5  
470 ( $n = 22$ ), S2 Text ( $n = 20$ ), and S2 Fig ( $n = 20$ ). According to Fig 5, Principal Axis 1, 2, and 3 for  
471 PCoA (Bray-Curtis dissimilarity) represent 20.4%, 14.5%, and 8.1% of the variation among the

472 samples respectively. The PCoA ordination illustrates that despite the different sampling sites, the  
473 samples in High T category clustered closely except BJ\_0620 which was greatly dominated by  
474 *Proteobacteria* (87.5%). In contrast, samples in the other two categories, especially Medium T  
475 exhibited dispersive distributions. According to PERMANOVA and PERMDISP (S4 Table), the  
476 influence of outdoor temperatures was statistically significant ( $R^2 = 0.24$ , adjusted  $P = 0.012$  between  
477 High T and Low T), and the differentiation was not due to differences in group dispersions ( $P =$   
478  $0.17$ ). In addition, a Mantel test (S5 Table) indicates a strong correlation between microbial  
479 community structures and outdoor temperatures (Spearman's  $\rho = 0.898$ ,  $P = 0.0001$ ).

480 **Fig 5. Principal coordinates analysis (PCoA).**

481 Based on the distance matrix of Bray-Curtis dissimilarity of microbial profiles (ASV-based) among  
482 all samples ( $n = 22$ ). HW: the weather samples collected in summer; CZ: samples collected in the  
483 same household in Changzhou; ZZ: samples collected in two nearby households in Zhengzhou.

484

485 Research spanning China, the Netherlands, and the U.S. has consistently found that temporal  
486 temperature variation, primarily driven by seasonal changes, is a controlling factor for the tap water  
487 microbiome [35, 72, 73]. Complementing this, another study in China revealed that increasing air  
488 temperature through indoor heating could lead to dramatic changes in the composition of the  
489 bacterial community in overnight stagnant tap water [74]. These findings challenge the previous  
490 discovery by Han et al. that only a weak correlation was found between air temperature and tap water  
491 bacterial community in China (Spearman's  $\rho = 0.088$ ,  $P = 0.092$ ) [57]. This might be caused by  
492 differences in sampling year, sites, and geography coverage. Notable, the source water microbiome  
493 could also exert a substantive influence on tap water microbiome [57]. Beyond the citizen science  
494 approach, more comprehensive metadata collection associated with microbiome sampling, as well as  
495 well-controlled studies systematically covering spatial and temporal variations, are needed to reveal  
496 the factors shaping the drinking water microbiome.

497

### 498 **3.5 Potential Pathogenic Bacteria in Drinking Water Microbiome**

499 In total, six bacteria genera containing pathogenic species and three pathogenic species were  
500 detected in all the PCR positive samples (n = 22) (Table 3). Five genera and one species that  
501 occurred in more than 30% of the samples (i.e., 7 samples) were categorized as common pathogens  
502 while the rest were grouped into rare pathogens (S6 Table). It is worth mentioning that the overall  
503 pattern of pathogens in the normal samples still holds when the two post-weather samples were  
504 included. This finding suggests that pathogen contamination in tap water could be a widespread  
505 phenomenon [35, 75].

506 **Table 3** Occurrence and mean relative abundance (RA) of major potential pathogens.

| <b>Pathogen Species</b>     | <b>Occurrence</b> | <b>Mean RA</b> |
|-----------------------------|-------------------|----------------|
| <i>Mycobacterium</i> spp.   | 22 (100.0%)       | 2.67E-02       |
| <i>Acinetobacter</i> spp.   | 22 (100.0%)       | 1.43E-02       |
| <i>Legionella</i> spp.      | 22 (100%)         | 4.59E-03       |
| <i>Brevundimonas</i> spp.   | 20 (90.9%)        | 6.12E-03       |
| <i>Leptospira</i> spp.      | 11 (50.0%)        | 2.04E-04       |
| <i>Escherichia coli</i>     | 8 (36.4%)         | 5.80E-04       |
| <i>Bacillus</i> spp.        | 3 (13.6%)         | 2.01E-05       |
| <i>Aeromonas hydrophila</i> | 2 (9.1%)          | 4.76E-05       |
| <i>Salmonella enterica</i>  | 1 (4.5%)          | 1.79E-04       |

507

508 The distribution of these potential pathogens within each water sample are detailed in Fig 6  
509 and the BLAST+ results of the potential pathogenic ASVs are provided in S7 Table. Common  
510 pathogens' mean relative abundance (RA) in all tap water samples ranged from 0.02% to 2.67%  
511 (normal samples: 0.02% - 1.95%) while that of rare pathogens was extremely low (S10 Table).  
512 *Mycobacterium* spp. (mean RA 2.67%, including rainfall events), *Acinetobacter* spp. (1.43%), and

513 *Legionella* spp. (0.46%) occurred in all the samples while *Leptospira* spp. (0.02%) were found in half  
514 of the samples. Notably, *Escherichia coli* ASVs (0.06%) (E-value =  $6e-132$ , Percent identity =  
515 100%) were detected in 36.4% of the samples. This is alarming since *E. coli* O157:H7 is the most  
516 common pathogenic strain that causes severe gastrointestinal (GI) illness in humans [76]. In addition,  
517 two *Brevundimonas* species, *B. vesicularis* and *B. diminuta*, are particularly considered emerging  
518 global opportunistic pathogens [77] were found in most of the samples (90.9%). Compared to normal  
519 samples, three more pathogenic bacteria species were detected in the post-weather samples, including  
520 *Salmonella enterica*, *Brevundimonas diminuta*, and *Aeromonas hydrophila*.

### 521 **Fig 6. Relative abundance of potential bacterial pathogens**

522 Pathogens in the figure legend are in the descending order of mean RA (from top to bottom).  
523 Samples are in the descending order of total RA of all pathogens in each sample (from left to right).  
524 Pre- and post-weather samples are labeled in black boxes and red boxes, respectively. Changzhou  
525 samples (typhoon) are in solid boxes, and Zhengzhou samples (floods) are in dashed boxes.

526

527 A summary of representative potential pathogens in drinking water systems and their related  
528 diseases is provided in S8 Table [1]. The discussions of several representative pathogen species for  
529 science communication purposes as well as the potential environmental drivers of waterborne  
530 pathogens are provided in S4 Text, S5 Text, and S3 Fig.

531 *E. coli*, a common fecal indicator bacteria [40], was widely detected by this study. The most  
532 polluted tap water samples are CZ\_0728 (RA: 0.61%), BJ\_0620 (0.51%), ZZ\_0802 (0.05%),  
533 CZ\_0712 (0.03%), and JN\_0219 (0.02%). The elevated RA of *E. coli* in the two post-weather  
534 samples suggests that the contamination might be related to the extreme rainfall events. Notably, the  
535 proportion of *E. coli* in BJ\_0620 was dramatically higher than that of other normal samples. It is  
536 worth mentioning that the traditional *E. coli* tests can be a generally reliable indicator of  
537 enteropathogenic serotypes in drinking water, but potential viable while non-culturable *E. coli* cells

538 could result in underestimations of the actual water contamination [78]. Therefore, it is recommended  
539 to use PCR or quantitative PCR (qPCR) methods for the monitoring of *E. coli* [79].

540 Additionally, the RA of total *Legionella* spp. was most abundant in ZZ\_0802 (1.32%),  
541 CZ\_0220 (1.25%), and ZB\_0502 (1.09%). Almost all species in the genera *Legionella* are thought to  
542 be potential human pathogens, but *L. pneumophila* (on Contaminant Candidate List 5 - CCL 5) is the  
543 main cause of Legionnaires' disease (pneumonia) and Pontiac fever (a milder infection) [38, 40].  
544 Potential *L. pneumophila* ASVs was detected in 22.7% (5) of the tap water samples (3 from Low T, 1  
545 from Median and High T respectively). Among those samples, the highest *L. pneumophila* RA was  
546 observed in ZZ\_0219 (RA: 0.237%), followed by MA\_0524 (0.035%), NC\_0210 (0.019%),  
547 XA\_0217 (0.011%), and SH\_0411 (0.010%). Moreover, some other pathogenic species such as *L.*  
548 *oakridgensis* and *L. maceachernii* occurred in TJ\_0715, LZ\_0822, XA\_0217, LJ\_0722, and  
549 ZZ\_0802.

550 *Salmonella* spp., a highly pathogenic bacteria, was detected in one sample despite its known  
551 susceptibility to disinfection. Notably, *Salmonella enterica* (ASV 3082, RA: 0.39%) was observed in  
552 the post-flood tap water microbiome from Zhengzhou (ZZ\_0802). However, the potential health risks  
553 remains uncertain, as the severity of the disease depends on the serotype and host factors of  
554 *Salmonella* [40]. Nonetheless, the presence of *Salmonella enterica* after 2021 Henan Floods indicates  
555 potential fecal contamination in the household drinking water after an extreme weather event.

556 Spearman's correlations between potential pathogens and total microbiome alpha diversity  
557 indexes are shown in Fig 7. When the impacts of extreme rainfall events were not considered (n =  
558 20), the RA of *Brevundimonas* spp. positively correlated with multiple pathogens and alpha diversity  
559 indexes, especially with *Mycobacterium* spp. ( $r = 0.84$ ,  $P < 0.001$ ) and the total RA of potential  
560 pathogens ( $r = 0.67$ ,  $P < 0.001$ ). This suggests *Brevundimonas* spp. to be a potential good candidate  
561 for indicator organisms. Notably, a significant correlation between the low alpha diversity of the  
562 microbial community and the samples positive for the presence of *E. coli* (Chao1:  $r = -0.24$ ,  $P < 0.05$ ;



563 Shannon:  $r = -0.21$ ,  $P < 0.05$ ) was observed. Similarly, Chopyk et al. [80] found the same pattern in  
564 their pre-harvest cattle hide samples. Therefore, it is worth understanding the relationship between  
565 indigenous water microbiomes and pathogenic *E. coli*, which might contribute to the  
566 control/prevention strategies for EHEC in tap water as well as indicators for risk assessment.

567 **Fig 7. Spearman's correlation of potential pathogens detected in normal samples (n = 20).**

568 1-3 asterisk(s) denote the significance level of 0.05, 0.01, and 0.001, respectively.

569

### 570 **3.6 Limitations and Future Work**

571 The current sampling procedure exhibits several limitations and could be improved in the  
572 future. First, to further minimize bias during the sample collection process, closer supervision of the  
573 volunteers (e.g., through cell phone video recording) and duplicate sample collection from the same  
574 location are needed. Second, systematic time-series sampling in the same location is necessary to  
575 understand temporal microbial patterns. Additionally, to pinpoint contamination sources, future  
576 studies could sample from water treatment system effluents to discern if contamination stems from  
577 treatment or pipeline issues. Moreover, collecting a comprehensive set of metadata (e.g. water  
578 temperature, nutrients, pH, etc.) associated with the microbiome sampling will help reveal the  
579 environmental factors shaping the drinking water microbiome.

580 To improve the success rate of sample collection, it is important to implement stricter controls  
581 on shipping temperatures and to collaborate with shipping companies. This collaboration will help  
582 reduce sample transportation costs, a critical factor in expanding the citizen science outreach beyond  
583 university affiliates. Meanwhile, developing an online platform could be helpful to disseminate the  
584 research results to the public, thereby promoting science education and citizen engagement.

585

## 586 **4 Conclusions**

587           Ensuring household drinking water safety is vital for public health due to the risks associated  
588 with microbial contamination. Combining citizen science sampling and culture-independent  
589 metabarcoding, this proof-of-concept study provided profiles of tap water microbiome and  
590 waterborne pathogens from various locations in China. This method, which extends beyond basic  
591 water collection and observation (e.g., water transparency), suggests that well-structured  
592 collaborations between professional agencies and citizen science can effectively monitor water  
593 quality on a broad scale.

594           In this study, a total of 7,635 prokaryotic ASVs were detected from 40 household drinking  
595 water samples from 28 cities of 18 provinces/regions in China. Despite the limited number of  
596 samples, extreme weather events, such as typhoons and floods, may exacerbate the presence of  
597 pathogens (e.g., *Escherichia coli* and *Salmonella* spp.) as well as toxin-producing cyanobacteria  
598 *Microcystis* in local tap water. This is particularly concerning in the current context of climate  
599 change, which may increase the frequency and intensity of such conditions. Additionally, this study  
600 highlights the valuable role that citizen science can play in advancing our understanding of  
601 environmental health risks and shaping public health policy.

602

## 603 Acknowledgements

604 First, we would like to thank Xiuwen Li for her support in sampling and data management. In  
605 addition, we are grateful to Shuai Gu and Yuchen Meng for their help with sample processing. Last  
606 but not the least, we wish to extend our special thanks to all the student volunteers who helped collect  
607 tap water samples across China and made this citizen science project possible.

608

## 609 References

- 610 1. Ramirez-Castillo FY, Loera-Muro A, Jacques M, Garneau P, Avelar-Gonzalez FJ, Harel J, et  
611 al. Waterborne pathogens: detection methods and challenges. *Pathogens*. 2015;4(2):307-34.
- 612 2. Motlagh AM, Yang Z. Detection and occurrence of indicator organisms and pathogens. *Water*  
613 *Environment Research*. 2019;91(10):1402-8.
- 614 3. Zhang J, Mauzerall DL, Zhu T, Liang S, Ezzati M, Remais JV. Environmental health in  
615 China: progress towards clean air and safe water. *Lancet*. 2010;375(9720):1110-9.
- 616 4. Yu X, Lin H, Zhang S. Microbial contamination in drinking water: occurrence, measurement  
617 and control. *Bulletin of the Chinese Academy of Sciences BCAS*. 2012;26(1):84-91.
- 618 5. Wen X, Chen F, Lin Y, Zhu H, Yuan F, Kuang D, et al. Microbial indicators and their use for  
619 monitoring drinking water quality—A review. *Sustainability*. 2020;12(6):2249.
- 620 6. Pandey PK, Kass PH, Soupir ML, Biswas S, Singh VP. Contamination of water resources by  
621 pathogenic bacteria. *AMB Express*. 2014;4(1):51.
- 622 7. Wang T, Sun D, Zhang Q, Zhang Z. China's drinking water sanitation from 2007 to 2018: A  
623 systematic review. *Sci Total Environ*. 2021;757:143923.
- 624 8. Altenburger R, Brack W, Burgess RM, Busch W, Escher BI, Focks A, et al. Future water  
625 quality monitoring: improving the balance between exposure and toxicity assessments of real-world  
626 pollutant mixtures. *Environmental Sciences Europe*. 2019;31(1):1-17.
- 627 9. Pocock MJ, Roy HE, Fox R, Ellis WN, Botham M. Citizen science and invasive alien species:  
628 predicting the detection of the oak processionary moth *Thaumetopoea processionea* by moth  
629 recorders. *Biological conservation*. 2017;208:146-54.
- 630 10. Albus K, Thompson R, Mitchell F. Usability of Existing Volunteer Water Monitoring Data:  
631 What Can the Literature Tell Us? *Citizen Science: Theory and Practice*. 2019;4(1).
- 632 11. Commission E. COMMISSION STAFF WORKING DOCUMENT: Best Practices in Citizen  
633 Science for Environmental Monitoring. European Commission; 2020.
- 634 12. Brouwer S, Van der Wielen PW, Schriks M, Claassen M, Frijns J. Public participation in  
635 science: the future and value of citizen science in the drinking water research. *Water*. 2018;10(3):284.
- 636 13. Roy HE, Pocock MJ, Preston CD, Roy DB, Savage J, Tweddle J, et al. Understanding citizen  
637 science and environmental monitoring: final report on behalf of UK Environmental Observation  
638 Framework. 2012.
- 639 14. Harper L. The Importance of Citizen Scientists American Forests 2018 [Available from:  
640 <https://www.americanforests.org/blog/the-importance-of-citizen-scientists/>.

- 641 15. Baalbaki R, Ahmad SH, Kays W, Talhouk SN, Saliba NA, Al-Hindi M. Citizen science in  
642 Lebanon—a case study for groundwater quality monitoring. *R Soc Open Sci.* 2019;6(2):181871.
- 643 16. Buxton AS, Groombridge JJ, Griffiths RA. Comparison of two citizen scientist methods for  
644 collecting pond water samples for environmental DNA studies. *Citizen Science: Theory and Practice.*  
645 2018;3(2).
- 646 17. Ho SY, Xu SJ, Lee FW. Citizen science: An alternative way for water monitoring in Hong  
647 Kong. *PLoS One.* 2020;15(9):e0238349.
- 648 18. Ashbolt NJ. Microbial Contamination of Drinking Water and Human Health from  
649 Community Water Systems. *Curr Environ Health Rep.* 2015;2(1):95-106.
- 650 19. Metcalfe AN, Kennedy TA, Mendez GA, Muehlbauer JD. Applied citizen science in  
651 freshwater research. *Wiley Interdisciplinary Reviews: Water.* 2022;9(2):e1578.
- 652 20. Zhang J, Chen S, Chen B, Du Y, Huang X, Pan X, et al. Citizen science: integrating scientific  
653 research, ecological conservation and public participation. *Biodiversity Science.* 2013;21(6):738.
- 654 21. Wu Y, Washbourne C, Haklay M. Citizen science in China's water resources monitoring:  
655 current status and future prospects. *International Journal of Sustainable Development & World  
656 Ecology.* 2022;29(3):277-90.
- 657 22. Allen MJ, Edberg SC, Reasoner DJ. Heterotrophic plate count bacteria—what is their  
658 significance in drinking water? *International journal of food microbiology.* 2004;92(3):265-74.
- 659 23. Garner E, Davis BC, Milligan E, Blair MF, Keenum I, Maile-Moskowitz A, et al. Next  
660 generation sequencing approaches to evaluate water and wastewater quality. *Water Research.*  
661 2021;194:116907.
- 662 24. Roeselers G, Coolen J, van der Wielen PW, Jaspers MC, Atsma A, de Graaf B, et al.  
663 Microbial biogeography of drinking water: patterns in phylogenetic diversity across space and time.  
664 *Environ Microbiol.* 2015;17(7):2505-14.
- 665 25. van der Wielen PW, van der Kooij D. Effect of water composition, distance and season on the  
666 adenosine triphosphate concentration in unchlorinated drinking water in the Netherlands. *Water Res.*  
667 2010;44(17):4860-7.
- 668 26. Ramirez KS, Knight CG, de Hollander M, Brearley FQ, Constantinides B, Cotton A, et al.  
669 Detecting macroecological patterns in bacterial communities across independent studies of global  
670 soils. *Nat Microbiol.* 2018;3(2):189-96.
- 671 27. Thompson LR, Sanders JG, McDonald D, Amir A, Ladau J, Locey KJ, et al. A communal  
672 catalogue reveals Earth's multiscale microbial diversity. *Nature.* 2017;551(7681):457-63.
- 673 28. Willis JR, Gonzalez-Torres P, Pittis AA, Bejarano LA, Cozzuto L, Andreu-Somavilla N, et al.  
674 Citizen science charts two major "stomatotypes" in the oral microbiome of adolescents and reveals  
675 links with habits and drinking water composition. *Microbiome.* 2018;6(1):218.
- 676 29. NMC-Typhoon. 2106 In-fa National Meteorological Centre - Typhoon2021 [Available from:  
677 <http://typhoon.nmc.cn/web.html>].
- 678 30. Chen S. Zhengzhou Rainstorm Once in a thousand years? The meteorological authority  
679 responded: A year's rain fell in one day. *Chinanews.* 2021.
- 680 31. China DIToTSCotPsRo. Investigation report on Zhengzhou 7.20 Rainstrom Disaster. In:  
681 China, MoEMotPsRo, editor. 2022.
- 682 32. NMC. National Meteorological Center2021 [Available from: <http://www.nmc.cn/>].
- 683 33. Lin Y, Gifford S, Ducklow H, Schofield O, Cassar N. Towards Quantitative Microbiome  
684 Community Profiling Using Internal Standards. *Appl Environ Microbiol.* 2019;85(5):e02634-18.
- 685 34. Kozich JJ, Westcott SL, Baxter NT, Highlander SK, Schloss PD. Development of a dual-  
686 index sequencing strategy and curation pipeline for analyzing amplicon sequence data on the MiSeq  
687 Illumina sequencing platform. *Appl Environ Microbiol.* 2013;79(17):5112-20.
- 688 35. Ley CJ, Proctor CR, Singh G, Ra K, Noh Y, Odimeyomi T, et al. Drinking water  
689 microbiology in a water-efficient building: stagnation, seasonality, and physicochemical effects on

- 690 opportunistic pathogen and total bacteria proliferation. *Environmental Science: Water Research &*  
691 *Technology*. 2020;6(10):2902-13.
- 692 36. Pinto AJ, Schroeder J, Lunn M, Sloan W, Raskin L. Spatial-temporal survey and occupancy-  
693 abundance modeling to predict bacterial community dynamics in the drinking water microbiome.  
694 *mBio*. 2014;5(3):e01135-14.
- 695 37. 2022 [cited January 28 2022]. Available from: <https://www.wunderground.com/>.
- 696 38. EPA. Contaminant Candidate List (CCL) and Regulatory Determination 2023 [Available  
697 from: <https://www.epa.gov/ccl/contaminant-candidate-list-5-ccl-5>].
- 698 39. EPA. Learn about Cyanobacteria and Cyanotoxins 2022 [Available from:  
699 <https://www.epa.gov/cyanohabs/learn-about-cyanobacteria-and-cyanotoxins#what3>].
- 700 40. WHO. Guidelines for Drinking-Water Quality (Fourth Edition) 2017. Available from:  
701 <https://www.who.int/publications/i/item/9789241549950>.
- 702 41. Martin M. Cutadapt removes adapter sequences from high-throughput sequencing reads.  
703 *EMBnet journal*. 2011;17(1):10-2.
- 704 42. Callahan BJ, McMurdie PJ, Rosen MJ, Han AW, Johnson AJ, Holmes SP. DADA2: High-  
705 resolution sample inference from Illumina amplicon data. *Nat Methods*. 2016;13(7):581-3.
- 706 43. Laws EA. *Aquatic Pollution: An Introductory Text*: Wiley; 2017.
- 707 44. Camacho C, Coulouris G, Avagyan V, Ma N, Papadopoulos J, Bealer K, et al. BLAST+:  
708 architecture and applications. *BMC Bioinformatics*. 2009;10(1):421.
- 709 45. Johnson JS, Spakowicz DJ, Hong BY, Petersen LM, Demkowicz P, Chen L, et al. Evaluation  
710 of 16S rRNA gene sequencing for species and strain-level microbiome analysis. *Nat Commun*.  
711 2019;10(1):5029.
- 712 46. Vej GW. *Bioinformatics explained: BLAST*. CLC bio; 2007.
- 713 47. Upton GJ. Fisher's exact test. *Journal of the Royal Statistical Society: Series A (Statistics in*  
714 *Society)*. 1992;155(3):395-402.
- 715 48. Andermann T, Antonelli A, Barrett RL, Silvestro D. Estimating alpha, beta, and gamma  
716 diversity through deep learning. *Frontiers in plant science*. 2022;13:839407.
- 717 49. McMurdie PJ, Holmes S. phyloseq: an R package for reproducible interactive analysis and  
718 graphics of microbiome census data. *PLoS One*. 2013;8(4):e61217.
- 719 50. Haegeman B, Hamelin J, Moriarty J, Neal P, Dushoff J, Weitz JS. Robust estimation of  
720 microbial diversity in theory and in practice. *ISME J*. 2013;7(6):1092-101.
- 721 51. Preheim SP, Perrotta AR, Friedman J, Smilie C, Brito I, Smith MB, et al. Computational  
722 methods for high-throughput comparative analyses of natural microbial communities. *Methods in*  
723 *enzymology*. 531: Elsevier; 2013. p. 353-70.
- 724 52. Oksanen J, Blanchet F, Kindt R. *Vegan: community ecology package*. R package version 2.3-0.  
725 2015.
- 726 53. Arbizu M. pairwiseAdonis: Pairwise multilevel comparison using adonis. R package version  
727 0.4 github2020 [Available from: <https://github.com/pmartinezarbizu/pairwiseAdonis>].
- 728 54. Anderson MJ. A new method for non-parametric multivariate analysis of variance. *Austral*  
729 *ecology*. 2001;26(1):32-46.
- 730 55. Anderson MJ. Distance-based tests for homogeneity of multivariate dispersions. *Biometrics*.  
731 2006;62(1):245-53.
- 732 56. Smouse PE, Long JC, Sokal RR. Multiple regression and correlation extensions of the Mantel  
733 test of matrix correspondence. *Systematic zoology*. 1986;35(4):627-32.
- 734 57. Han Z, An W, Yang M, Zhang Y. Assessing the impact of source water on tap water bacterial  
735 communities in 46 drinking water supply systems in China. *Water Res*. 2020;172:115469.
- 736 58. Ji P, Parks J, Edwards MA, Pruden A. Impact of Water Chemistry, Pipe Material and  
737 Stagnation on the Building Plumbing Microbiome. *PLoS One*. 2015;10(10):e0141087.

- 738 59. Ling F, Whitaker R, LeChevallier MW, Liu WT. Drinking water microbiome assembly  
739 induced by water stagnation. *ISME J.* 2018;12(6):1520-31.
- 740 60. Corning. Syringe Filters 2023 [Available from: [https://ecatalog.corning.com/life-](https://ecatalog.corning.com/life-sciences/b2c/US/en/Cell-Culture/Filtration/Syringe-Filters/Syringe-Filters/p/syringeFilters)  
741 [sciences/b2c/US/en/Cell-Culture/Filtration/Syringe-Filters/Syringe-Filters/p/syringeFilters](https://ecatalog.corning.com/life-sciences/b2c/US/en/Cell-Culture/Filtration/Syringe-Filters/Syringe-Filters/p/syringeFilters).
- 742 61. MilliporeSigma. Sterivex 2023 [Available from:  
743 [https://www.sigmaaldrich.com/US/en/search/sterivex?focus=products&page=1&perpage=30&sort=r](https://www.sigmaaldrich.com/US/en/search/sterivex?focus=products&page=1&perpage=30&sort=relevance&term=sterivex&type=product)  
744 [elevance&term=sterivex&type=product](https://www.sigmaaldrich.com/US/en/search/sterivex?focus=products&page=1&perpage=30&sort=relevance&term=sterivex&type=product).
- 745 62. Hull NM, Holinger EP, Ross KA, Robertson CE, Harris JK, Stevens MJ, et al. Longitudinal  
746 and source-to-tap New Orleans, LA, USA drinking water microbiology. *Environmental Science &*  
747 *Technology.* 2017;51(8):4220-9.
- 748 63. Pinto AJ, Xi C, Raskin L. Bacterial community structure in the drinking water microbiome is  
749 governed by filtration processes. *Environmental science & technology.* 2012;46(16):8851-9.
- 750 64. Ivone V-M, Conceição E, Olga C N, Célia M M. Bacterial diversity from the source to the tap:  
751 a comparative study based on 16S rRNA gene-DGGE and culture-dependent methods. *FEMS*  
752 *microbiology ecology.* 2013;83(2):361-74.
- 753 65. Jia S, Shi P, Hu Q, Li B, Zhang T, Zhang XX. Bacterial Community Shift Drives Antibiotic  
754 Resistance Promotion during Drinking Water Chlorination. *Environ Sci Technol.*  
755 2015;49(20):12271-9.
- 756 66. Chiao TH, Clancy TM, Pinto A, Xi C, Raskin L. Differential resistance of drinking water  
757 bacterial populations to monochloramine disinfection. *Environ Sci Technol.* 2014;48(7):4038-47.
- 758 67. Inkinen J, Siponen S, Jayaprakash B, Tiwari A, Hokajarvi AM, Pursiainen A, et al. Diverse  
759 and active archaea communities occur in non-disinfected drinking water systems-Less activity  
760 revealed in disinfected and hot water systems. *Water Res X.* 2021;12:100101.
- 761 68. Dai Z, Sevillano-Rivera MC, Calus ST, Bautista-de Los Santos QM, Eren AM, van der  
762 Wielen P, et al. Disinfection exhibits systematic impacts on the drinking water microbiome.  
763 *Microbiome.* 2020;8(1):42.
- 764 69. Franca L, Lopez-Lopez A, Rossello-Mora R, da Costa MS. Microbial diversity and dynamics  
765 of a groundwater and a still bottled natural mineral water. *Environ Microbiol.* 2015;17(3):577-93.
- 766 70. Bautista-de los Santos QM, Schroeder JL, Sevillano-Rivera MC, Sungthong R, Ijaz UZ,  
767 Sloan WT, et al. Emerging investigators series: microbial communities in full-scale drinking water  
768 distribution systems—a meta-analysis. *Environmental Science: Water Research & Technology.*  
769 2016;2(4):631-44.
- 770 71. Tang W, Liu Y, Li Q, Chen L, Li Q, Li P, et al. The Impact of Extreme Weather Events on  
771 Bacterial Communities and Opportunistic Pathogens in a Drinking Water Treatment Plant. *Water.*  
772 2021;14(1):54.
- 773 72. Zhang H, Xu L, Huang T, Yan M, Liu K, Miao Y, et al. Combined effects of seasonality and  
774 stagnation on tap water quality: Changes in chemical parameters, metabolic activity and co-existence  
775 in bacterial community. *Journal of Hazardous Materials.* 2021;403:124018.
- 776 73. Zlatanović L, van der Hoek JP, Vreeburg J. An experimental study on the influence of water  
777 stagnation and temperature change on water quality in a full-scale domestic drinking water system.  
778 *Water research.* 2017;123:761-72.
- 779 74. Zhang H, Xu L, Huang T, Liu X, Miao Y, Liu K, et al. Indoor heating triggers bacterial  
780 ecological links with tap water stagnation during winter: Novel insights into bacterial abundance,  
781 community metabolic activity and interactions. *Environmental Pollution.* 2021;269:116094.
- 782 75. Ma L, Jiang XT, Guan L, Li B, Zhang T. Nationwide biogeography and health implications of  
783 bacterial communities in household drinking water. *Water Res.* 2022;215:118238.
- 784 76. Lim JY, Yoon JW, Hovde CJ. A brief overview of *Escherichia coli* O157: H7 and its plasmid  
785 O157. *Journal of microbiology and biotechnology.* 2010;20(1):5.

786 77. Ryan MP, Pembroke JT. *Brevundimonas* spp: Emerging global opportunistic pathogens.  
787 Virulence. 2018;9(1):480-93.

788 78. Liu Y, Gilchrist A, Zhang J, Li XF. Detection of viable but nonculturable *Escherichia coli*  
789 O157:H7 bacteria in drinking water and river water. *Appl Environ Microbiol.* 2008;74(5):1502-7.

790 79. Wolf-Baca M, Siedlecka A. Detection of pathogenic bacteria in hot tap water using the qPCR  
791 method: preliminary research. *SN Applied Sciences.* 2019;1(8):1-9.

792 80. Chopyk J, Moore RM, DiSpirito Z, Stromberg ZR, Lewis GL, Renter DG, et al. Presence of  
793 pathogenic *Escherichia coli* is correlated with bacterial community diversity and composition on pre-  
794 harvest cattle hides. *Microbiome.* 2016;4(1):1-11.

795

## 796 **Non-standard abbreviations**

797 RA: Relative abundance

798 CS: Citizen science sampling protocol and materials

799 NC: Nanchang, Jiangxi

800 XA: Xi'an, Shanxi

801 NJ: Nanjing, Jiangsu

802 HZ: Huizhou, Guangdong

803 JN: Jinan, Shandong

804 ZZ: Zhengzhou, Henan

805 CZ: Changzhou, Jiangsu

806 SH: Shanghai

807 ZB: Zibo, Shandong

808 MA: Macau

809 BJ: Beijing

810 TJ: Tianjin

811 CQ: Chongqing

812 LJ: Lijiang, Yunnan

813 LZ: Lanzhou, Gansu

814

## 815 **Supporting Information Captions**

816 S1 Table. Sample information.

817 S1 Text. Top 20 ASVs in the three temperature categories.

818 S1 Fig. Relative abundance of top 20 ASVs in household drinking water samples.

819 S2 Table. Fisher's exact test: Positive PCR signal vs. Negative PCR signal in terms of annual  
820 precipitation (non-humid and humid).

821 S3 Table. The phylum-level taxonomic composition for each sample.

822 S2 Text. Beta-diversity (Normal samples, n = 20).

823 S2 Fig. Principal coordinates analysis (PCoA) of the normal samples (n = 20).

824 S4 Table. PERMANOVA and PERMDISP of beta diversity.

825 S5 Table. Mantel statistic (Spearman's rank correlation, permutations = 999).

826 S6 Table. The relative abundance of bacterial pathogens in each sample.

827 S7 Table. BLAST+ results of potential pathogens.

828 S8 Table. Pathogens in drinking water systems and their related diseases.

829 S3 Text. Sample storage test.

830 S4 Text. Representative pathogen species.

831 S5 Text. Potential environmental drivers: extreme precipitation and heat.

832 S3 Fig. Linear correlation (normal samples, Spearman): Outdoor temperature (higher than 17°C) ~  
833 Total relative abundance of potential pathogens.



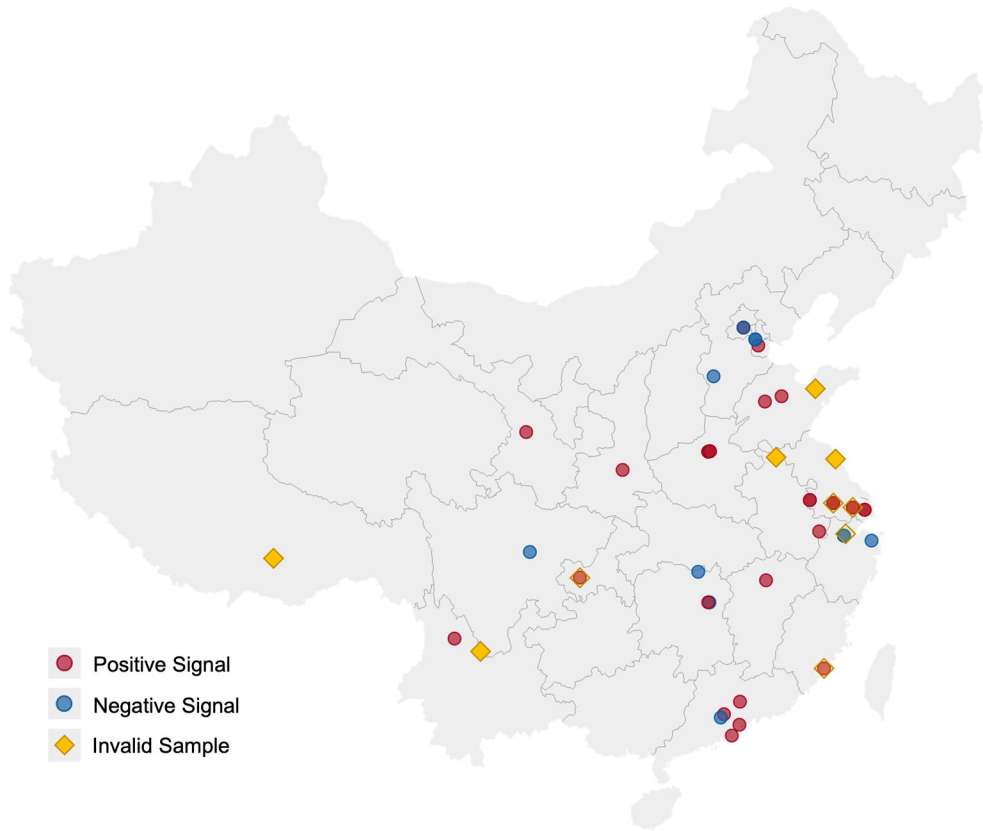

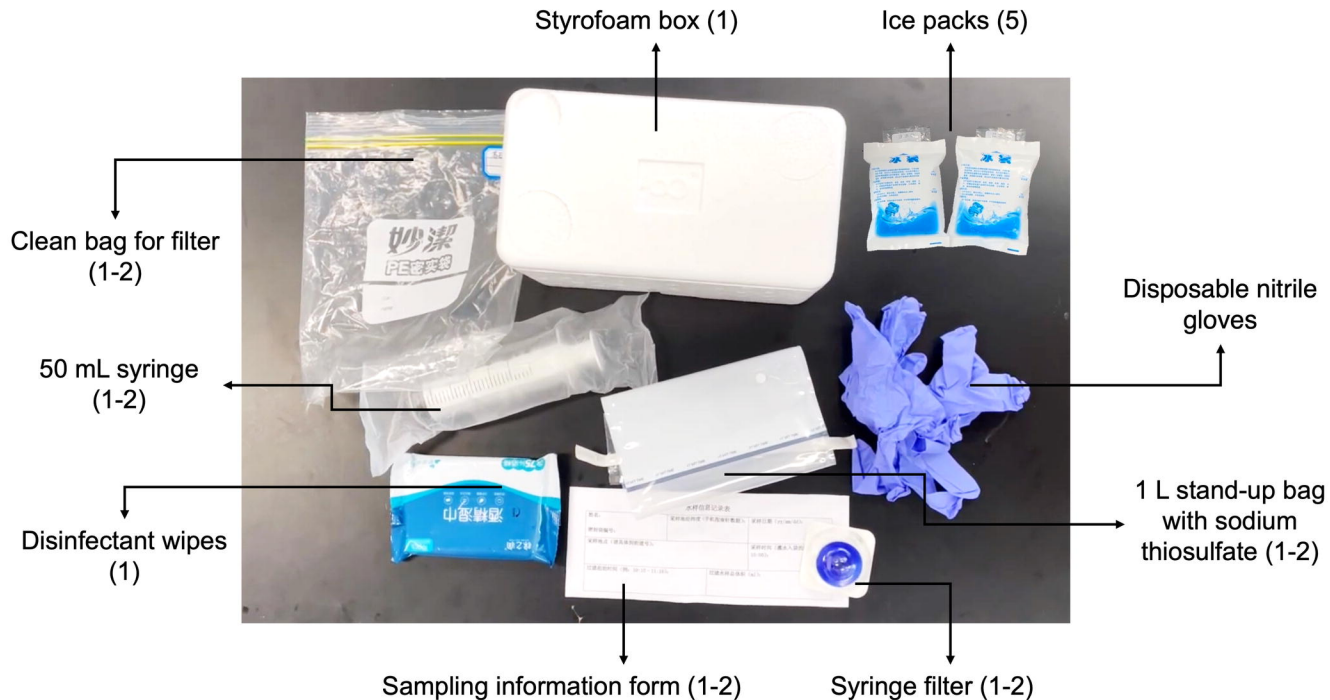

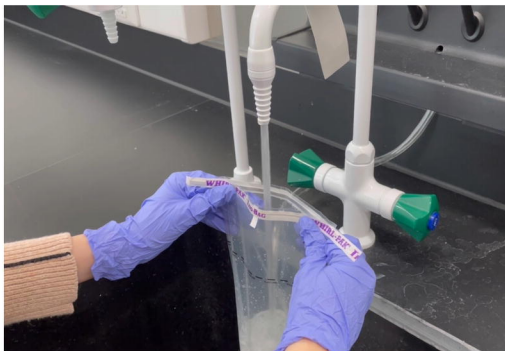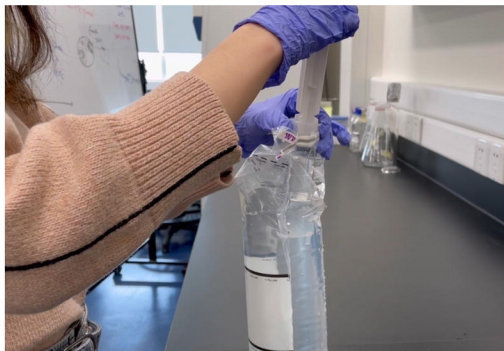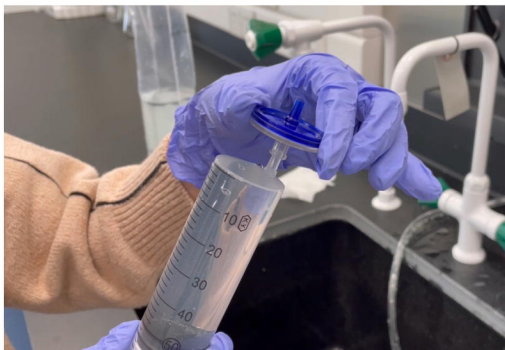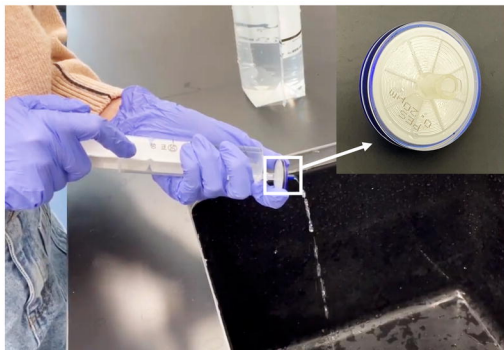

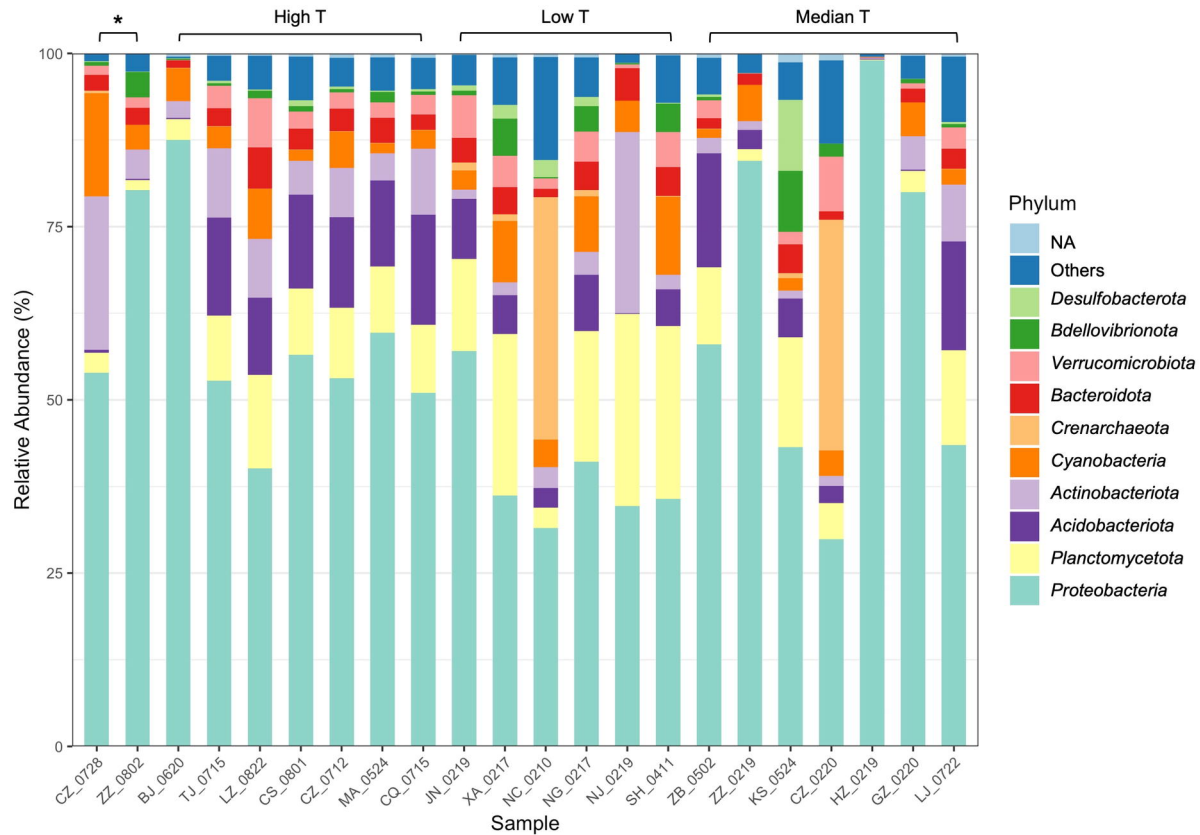

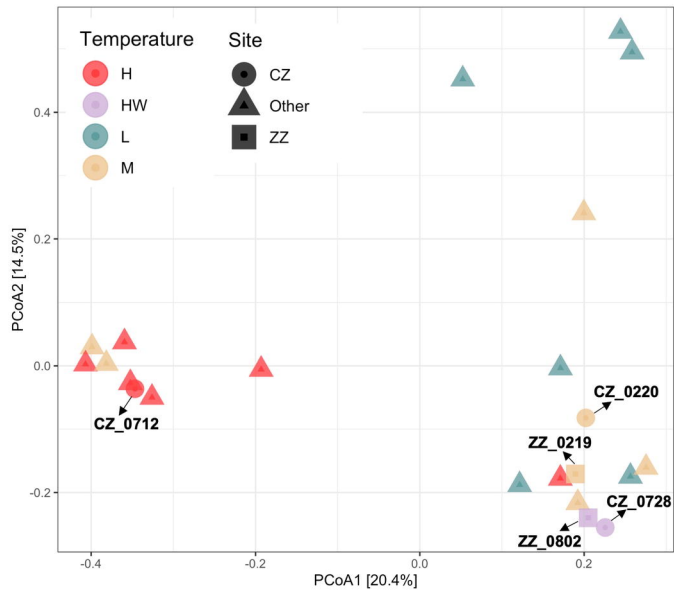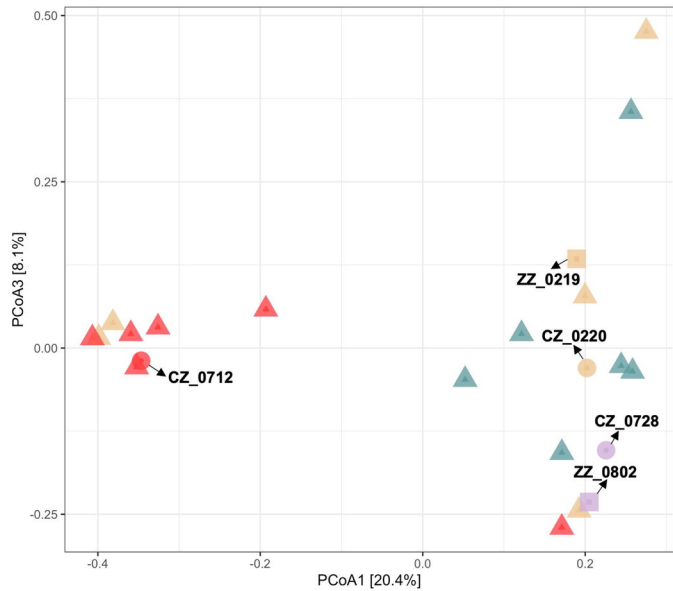

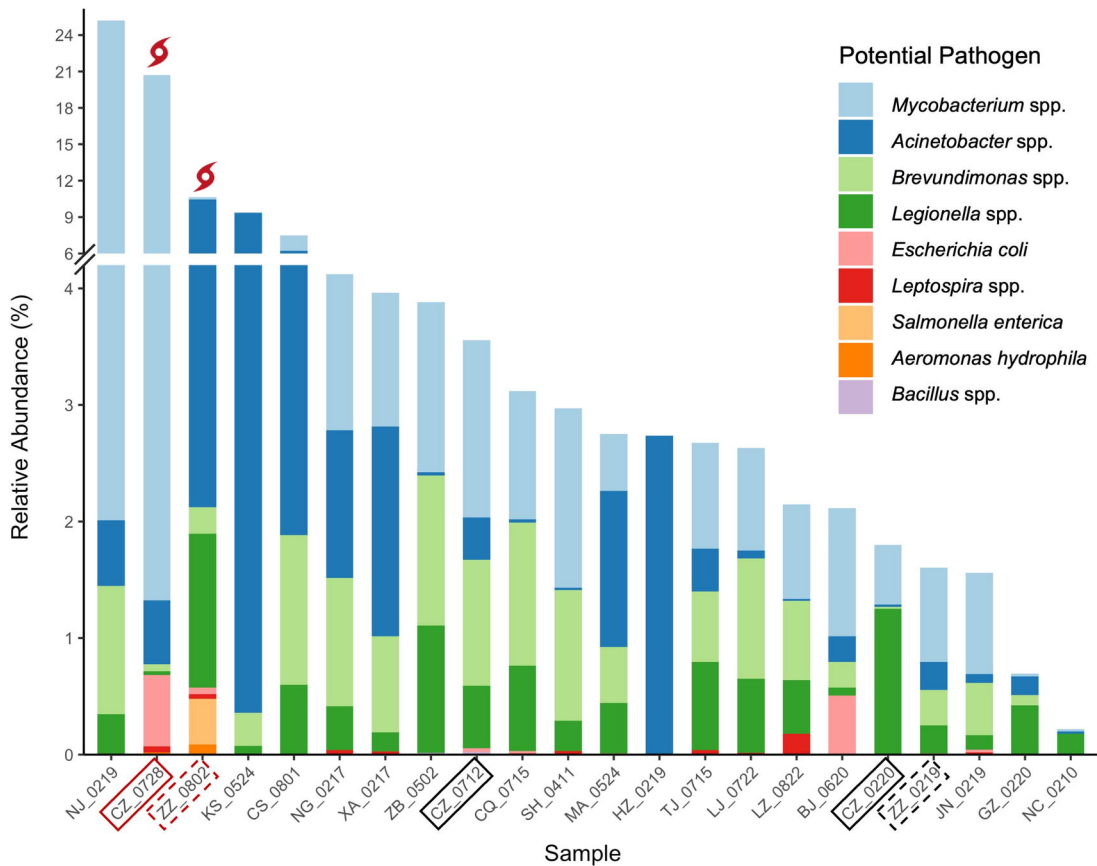

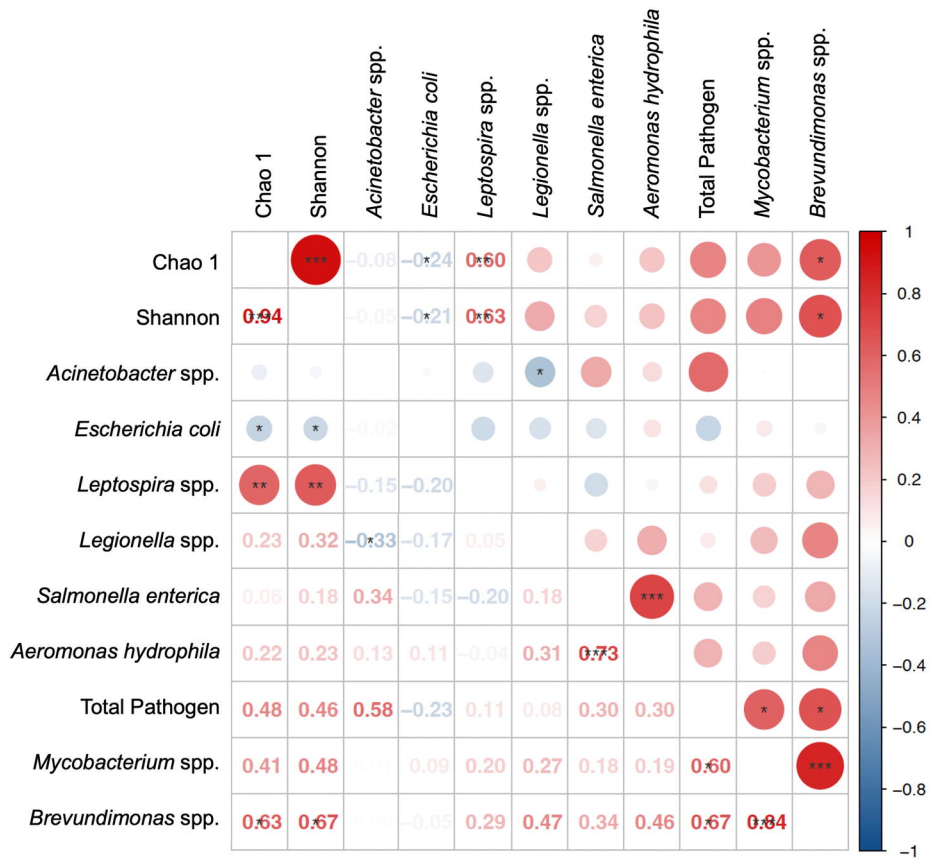

Source: https://medrxiv.org/content/10.1101/2023.10.16.23297104v2.full.pdf
